# Supplementary material for: Tissue lipidomics, network pharmacology, and molecular docking to explore the therapeutic mechanism of anthocyanins from Lycium ruthenicum Murr. against gouty arthritis
Source: Royal Society of Chemistry journal article supplement (doi:10.1039/d1fo04377c), 2023-01-01
Supplement: d1fo04377c1.pdf [file d1fo04377c1.pdf]

## Supplementary information

### **Tissue Lipidomics, Network Pharmacology, and Molecular Docking to Explore the Therapeutic Mechanism of Anthocyanins from *Lycium ruthenicum* Murr. against Gouty Arthritis**

Li Li <sup>a1</sup>, Qiangqiang Jia <sup>c1</sup>, Haiqin Zhang <sup>b</sup>, Lingyun Yi <sup>a</sup>, Yingyu Tang <sup>b</sup>, Ping Hu <sup>a</sup>

Hongyang Zhang <sup>a,b\*</sup>, Rui Wang <sup>b\*</sup>

<sup>a</sup> School of Chemistry and Molecular Engineering, East China University of Science and Technology, Shanghai 200237, China

<sup>b</sup> Shanghai Key Laboratory of New Drug Design, School of Pharmacy, East China University of Science and Technology, Shanghai 200237, China

<sup>c</sup> State Key Laboratory of Plateau Ecology and Agriculture, Qinghai University, Xining 810016, China

<sup>1</sup> These authors contributed equally to this work.

\* Corresponding author. Tel.: +86-21-64252844.

E-mail: hongyang\_zhang@ecust.edu.cn (H. Zhang); ruiwang@ecust.edu.cn (R. Wang).

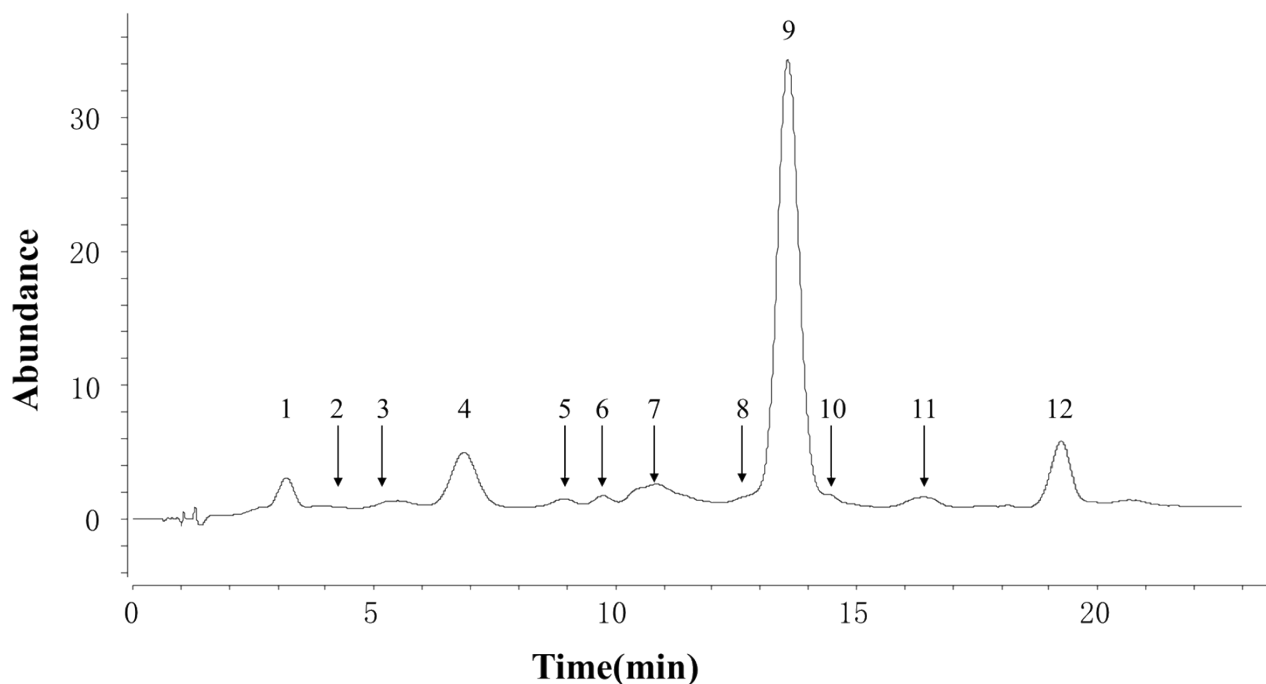

**Figure S1.** UPLC chromatogram at 520 nm of anthocyanins from LR. 5 mg of LR anthocyanins was dissolved in 1 mL of H<sub>2</sub>O, filtered through a 0.2 μm membrane into a brown vial. Column: Agilent Eclipse Plus C18 (100 × 2.1 mm, 1.8 μm); Flow rate: 0.3 mL/min; Column temperature: 35°C; Solvent A: 0.1% HCOOH in H<sub>2</sub>O, solvent B: ACN; The gradient program: 0-2 min, 5% to 10% B; 2-18 min, 10% to 17% B; 18-22 min, 17% B; 22-25 min, 17% to 35% B; 25-28 min, 35% to 5% B. The MS ionization mode was positive and the MS detection was under the following parameters: gas temperature 350°C, gas flow 10 L/min, nebulizer 30 psi, capillary voltage 3500 V, skimmer voltage 65 V, octopole RF voltage 750 V, fragmentor voltage 150 V. The full-scan MS spectra were acquired over a *m/z* range of 50-1500. The MS/MS collision energies were set at 20 and 40 eV, respectively. A reference solution was sprayed as continuous calibration using the following reference masses:

|            |          |     |           |
|------------|----------|-----|-----------|
| <i>m/z</i> | 121.0509 | and | 922.0098. |
|------------|----------|-----|-----------|

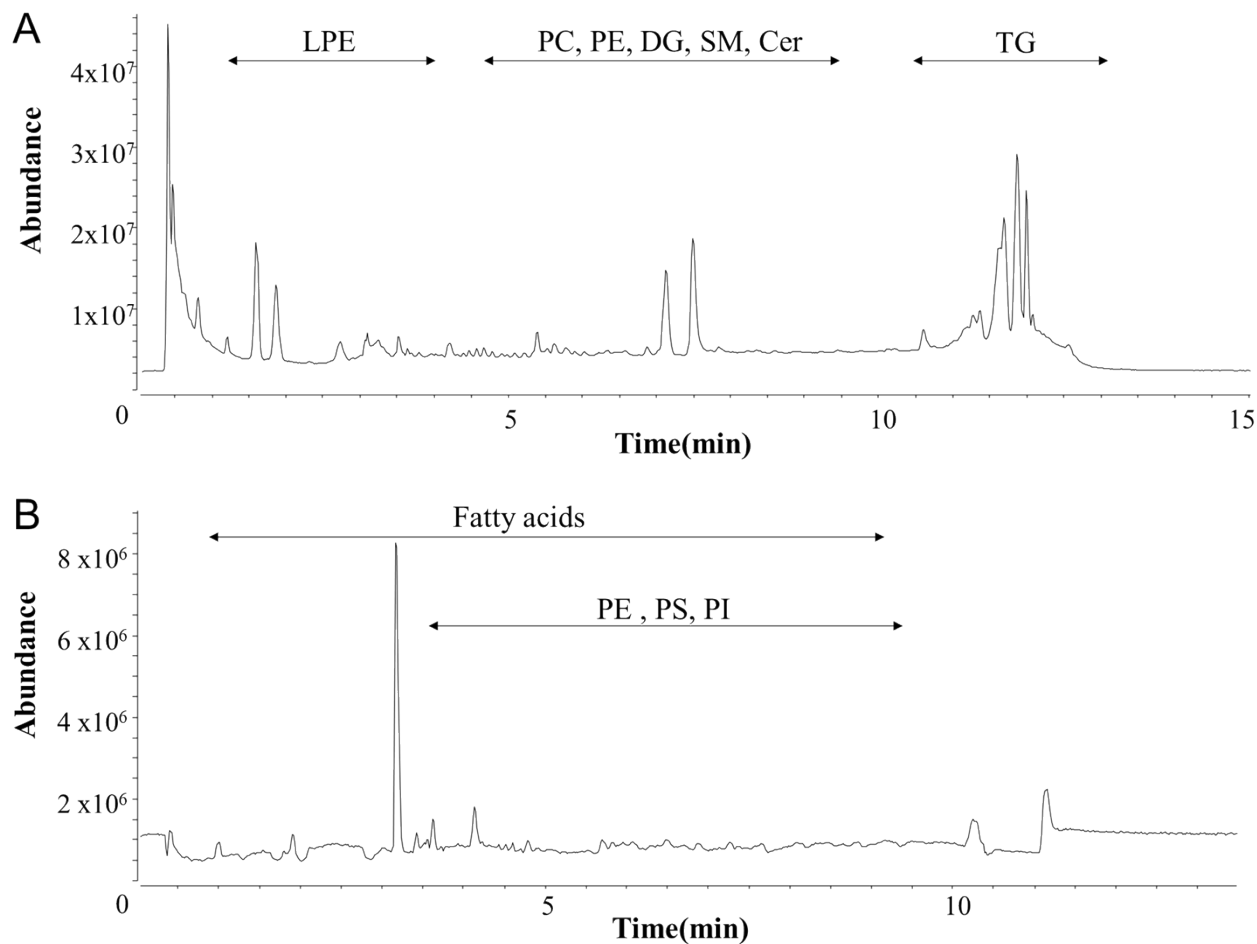

**Figure S2.** LC-MS TIC diagrams of mice ankle joints under (A) positive and (B) negative mode. LPE: Lysophosphatidylethanolamine, PC: Phosphatidylcholine, PE: Phosphatidylethanolamine, DG: Diacylglycerol, SM: Sphingomyelin, Cer: Ceramide, TG: Triacylglycerol, PS: Phosphatidylserine, PI: Phosphatidylinositol.

CG, MG, PG, AG200, AG400

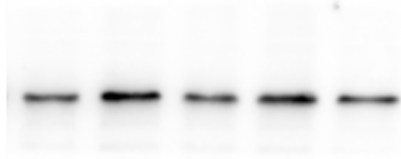

MMP2-1

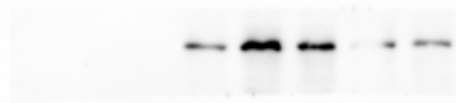

MMP2-2

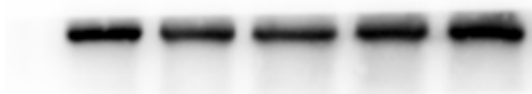

$\alpha$ -Tubulin-1

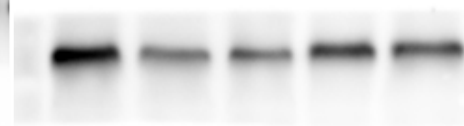

$\alpha$ -Tubulin-2

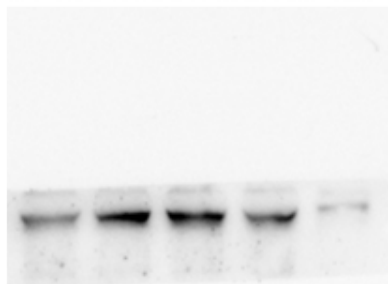

MMP2-3

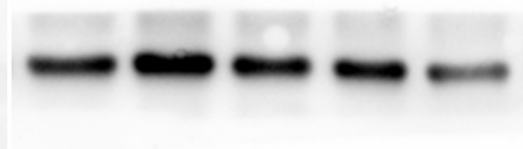

MMP2-4

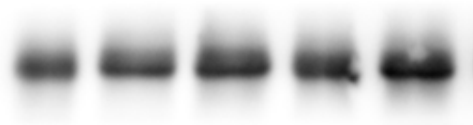

$\alpha$ -Tubulin-3

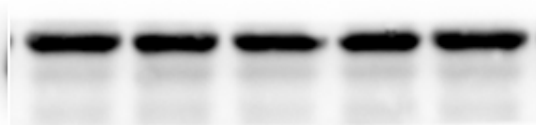

$\alpha$ -Tubulin-4

CG, MG, PG, AG200, AG400

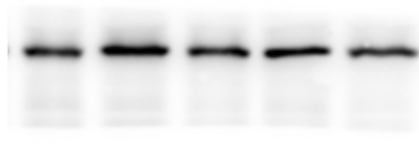

MMP9-1

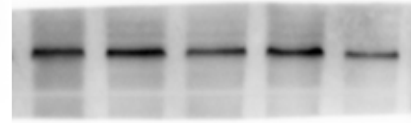

MMP9-2

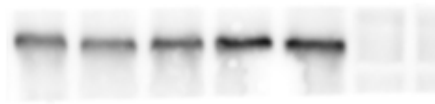

$\alpha$ -Tubulin-1

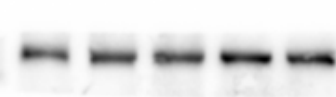

$\alpha$ -Tubulin-2

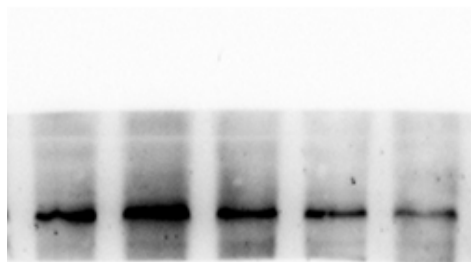

MMP9-3

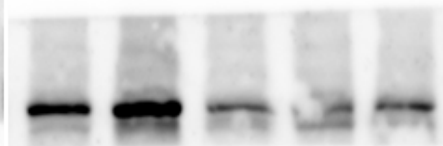

MMP9-4

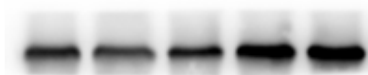

$\alpha$ -Tubulin-3

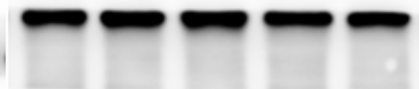

$\alpha$ -Tubulin-4

CG, MG, PG, AG200, AG400

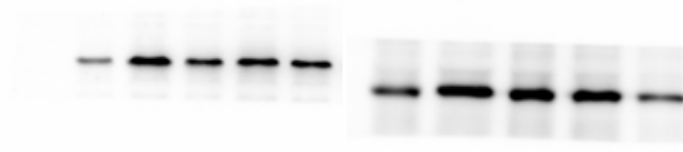

MAP2K1-1

MAP2K1-2

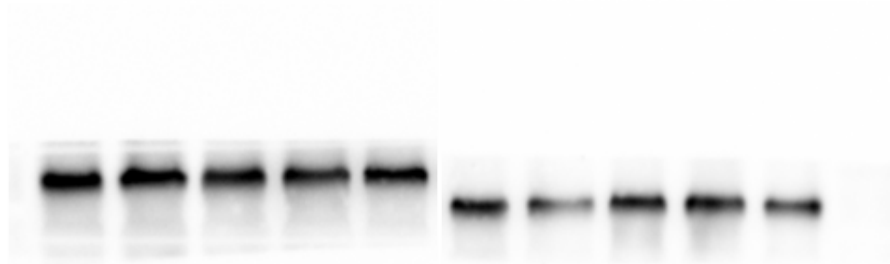

$\alpha$ -Tubulin-1

$\alpha$ -Tubulin-2

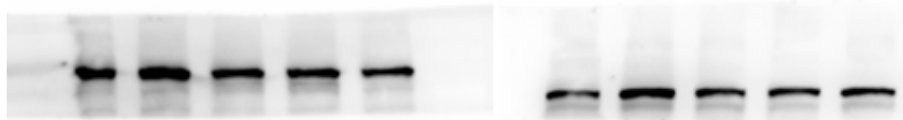

MAP2K1-3

MAP2K1-4

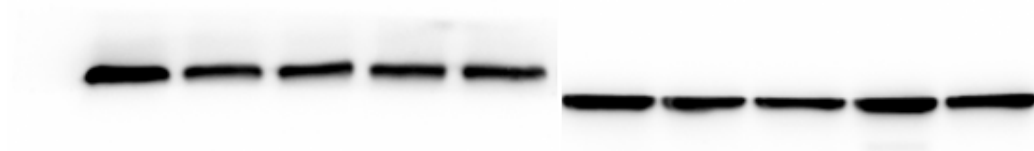

$\alpha$ -Tubulin-3

$\alpha$ -Tubulin-4

CG, MG, PG, AG200, AG400

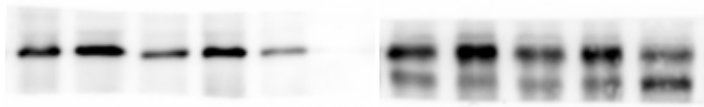

MAPK14-1

MAPK14-2

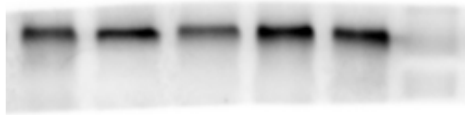

$\alpha$ -Tubulin-1

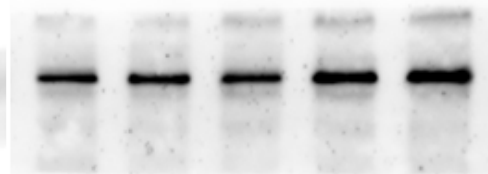

$\alpha$ -Tubulin-2

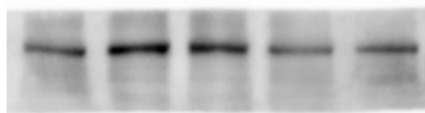

MAPK14-3

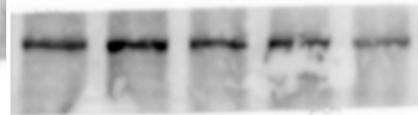

MAPK14-4

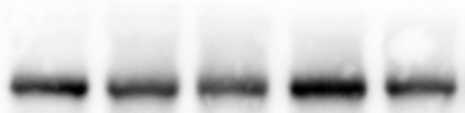

$\alpha$ -Tubulin-3

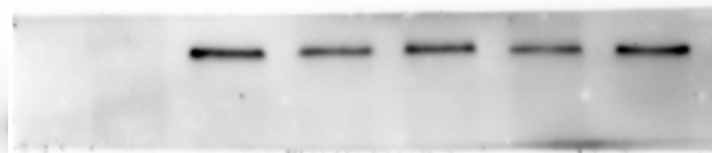

$\alpha$ -Tubulin-4

**Figure S3.** Raw images of Western blotting of MMP2, MMP9, MAP2K1, and MAPK14 in mice ankle joints from CG, MG, PG, AG200 and AG400 ( $n = 4$ ).

**Table S1. MS-based identification of the lipid molecular species detected in the present study**

| RT<br>(min) | Lipids                    | Adduct                            | <i>m/z</i> | MS/MS                                                        | CG vs. MG  |                |      | MG vs. AG200   |      | MG vs. AG400   |      |
|-------------|---------------------------|-----------------------------------|------------|--------------------------------------------------------------|------------|----------------|------|----------------|------|----------------|------|
|             |                           |                                   |            |                                                              | <i>VIP</i> | <i>P</i> value | FC   | <i>P</i> value | FC   | <i>P</i> value | FC   |
| 3.20        | PC(O-32:3)/<br>PC(P-32:2) | [M+H] <sup>+</sup>                | 714.5372   | 59.0494, 89.0602, 283.2625                                   | 1.54       | 1.2E-02        | 1.28 | 3.6E-03        | 0.76 | 1.5E-03        | 0.77 |
| 3.35        | LPC(24:0)                 | [M+H] <sup>+</sup>                | 608.4673   | 59.0501, 89.0594, 309.2754, 437.3180                         | 1.00       | 2.3E-02        | 1.23 | 1.7E-04        | 0.73 | 1.2E-03        | 0.80 |
| 3.58        | PC(O-34:4)<br>/PC(P-34:3) | [M+H] <sup>+</sup>                | 740.5528   | 89.0594, 309.2772, 723.5234                                  | 1.74       | 1.4E-02        | 1.24 | 2.8E-04        | 0.74 | 1.1E-03        | 0.79 |
| 5.10        | PC(42:3)                  | [M+H] <sup>+</sup>                | 868.6728   | 59.0524, 184.1753, 255.2302, 387.3093                        | 1.99       | 1.2E-02        | 1.28 | 1.5E-03        | 0.75 | 8.4E-04        | 0.75 |
| 5.20        | PC(O-40:4)/<br>PC(P-40:3) | [M+H] <sup>+</sup>                | 824.6467   | 87.0436, 227.1986, 255.2299, 527.3050                        | 2.11       | 1.2E-02        | 1.26 | 3.5E-04        | 0.74 | 5.7E-04        | 0.76 |
| 5.35        | SM(34:1)                  | [M+H] <sup>+</sup>                | 703.5755   | 87.0445, 184.0721, 641.5085                                  | 1.38       | 1.6E-03        | 1.66 | 7.0E-01        | 0.97 | 4.5E-01        | 0.93 |
| 5.90        | PC(O-42:4)                | [M+H] <sup>+</sup>                | 852.6781   | 59.0489, 255.2321, 283.2636, 465.3186                        | 1.61       | 1.7E-02        | 1.26 | 4.8E-04        | 0.74 | 5.4E-04        | 0.75 |
| 6.02        | PC(O-44:5)                | [M+H] <sup>+</sup>                | 878.6935   | 89.0628, 227.1992, 309.2810, 470.3211                        | 1.13       | 1.2E-02        | 1.28 | 9.6E-04        | 0.75 | 7.8E-04        | 0.75 |
| 6.23        | PC(32:0)                  | [M+H] <sup>+</sup>                | 734.5702   | 64.9773, 86.0947, 184.0714, 482.3289                         | 2.36       | 1.6E-04        | 1.79 | 7.6E-02        | 0.86 | 1.7E-02        | 0.79 |
| 7.65        | DG(36:5)                  | [M+H] <sup>+</sup>                | 615.4964   | 59.0491, 129.0924, 337.9666                                  | 0.90       | 1.1E-02        | 1.30 | 3.5E-04        | 0.73 | 1.2E-04        | 0.67 |
| 7.68        | SM(42:2)                  | [M+H] <sup>+</sup>                | 813.6845   | 184.0722, 413.2722                                           | 1.29       | 2.0E-04        | 2.19 | 2.4E-01        | 0.92 | 5.7E-01        | 1.04 |
| 7.73        | DG(38:6)                  | [M+H] <sup>+</sup>                | 641.5122   | 89.0604, 321.3859                                            | 1.00       | 1.1E-02        | 1.36 | 1.8E-03        | 0.73 | 1.5E-03        | 0.68 |
| 7.93        | Cer(38:0)                 | [M+H] <sup>+</sup>                | 596.5993   | 282.2781, 284.2922                                           | 0.37       | 5.5E-03        | 1.27 | 3.8E-04        | 0.77 | 3.5E-04        | 0.77 |
| 9.43        | PA(32:1)                  | [M+H] <sup>+</sup>                | 647.4608   | 59.0497, 103.0750, 467.3161                                  | 1.26       | 1.7E-02        | 1.18 | 3.9E-04        | 0.80 | 1.4E-04        | 0.79 |
| 11.20       | TG(50:4)                  | [M+NH <sub>4</sub> ] <sup>+</sup> | 844.7404   | 109.1020, 219.2095, 549.4852,<br>573.4881, 599.4857          | 3.35       | 1.2E-02        | 1.24 | 4.6E-03        | 0.85 | 9.7E-04        | 0.81 |
| 11.43       | TG(51:4)                  | [M+NH <sub>4</sub> ] <sup>+</sup> | 858.7553   | 59.0563, 311.2563, 559.4631, 573.4844,<br>587.4983           | 1.27       | 1.0E-02        | 1.33 | 4.1E-02        | 0.83 | 4.1E-02        | 0.83 |
| 11.47       | TG(46:1)                  | [M+NH <sub>4</sub> ] <sup>+</sup> | 794.7248   | 95.0846, 495.4351, 521.451, 549.4884                         | 2.59       | 1.2E-02        | 1.47 | 3.1E-01        | 0.91 | 2.2E-02        | 0.79 |
| 11.52       | TG(53:5)                  | [M+NH <sub>4</sub> ] <sup>+</sup> | 884.7693   | 123.1154, 165.1631, 335.2586,<br>587.5001                    | 1.28       | 8.0E-03        | 1.36 | 4.1E-02        | 0.83 | 4.4E-02        | 0.83 |
| 11.53       | TG(48:2)                  | [M+NH <sub>4</sub> ] <sup>+</sup> | 820.7407   | 57.0699, 265.2564, 523.4703, 549.4888,<br>575.5013           | 5.00       | 2.8E-03        | 1.42 | 4.2E-01        | 0.94 | 2.9E-02        | 0.81 |
| 11.60       | TG(56:7)                  | [M+NH <sub>4</sub> ] <sup>+</sup> | 922.7875   | 95.0857, 273.2581, 577.5193, 599.5029,<br>625.5220           | 1.17       | 2.0E-02        | 1.21 | 2.6E-01        | 0.91 | 8.3E-03        | 0.72 |
| 11.60       | TG(58:8)                  | [M+NH <sub>4</sub> ] <sup>+</sup> | 948.8030   | 247.2081, 601.5278, 651.5315,<br>875.7061                    | 1.23       | 1.0E-03        | 1.32 | 1.3E-01        | 0.89 | 6.8E-03        | 0.77 |
| 11.68       | TG(47:1)                  | [M+NH <sub>4</sub> ] <sup>+</sup> | 808.7377   | 57.0682, 115.0726, 451.3367, 509.4581,<br>537.4882, 565.5155 | 1.57       | 2.1E-05        | 1.37 | 6.6E-03        | 0.87 | 4.1E-04        | 0.83 |
| 11.80       | TG(46:0)                  | [M+NH <sub>4</sub> ] <sup>+</sup> | 796.7402   | 57.0702, 257.2394, 523.4789, 552.5037                        | 1.95       | 4.7E-05        | 1.51 | 1.6E-04        | 0.82 | 5.8E-05        | 0.77 |
| 11.80       | TG(53:4)                  | [M+NH <sub>4</sub> ] <sup>+</sup> | 886.7876   | 263.2414, 327.2877, 589.5221,<br>601.5225                    | 2.31       | 6.0E-03        | 1.45 | 4.3E-02        | 0.83 | 4.3E-02        | 0.82 |
| 11.82       | TG(48:1)                  | [M+NH <sub>4</sub> ] <sup>+</sup> | 822.7573   | 57.0710, 311.2504, 549.4816, 551.4954                        | 6.20       | 1.1E-04        | 1.82 | 3.2E-01        | 0.93 | 6.0E-03        | 0.78 |
| 11.83       | TG(58:7)                  | [M+NH <sub>4</sub> ] <sup>+</sup> | 950.8191   | 89.0589, 285.2180, 317.2479, 627.5298,<br>655.5679           | 1.72       | 1.3E-04        | 1.34 | 1.4E-01        | 0.91 | 4.9E-03        | 0.82 |
| 11.93       | TG(53:3)                  | [M+NH <sub>4</sub> ] <sup>+</sup> | 888.8033   | 95.0858, 591.5385, 603.5364, 617.5541                        | 4.56       | 1.6E-04        | 1.51 | 2.0E-02        | 0.87 | 6.8E-03        | 0.83 |
| 11.97       | TG(48:0)                  | [M+NH <sub>4</sub> ] <sup>+</sup> | 824.7732   | 59.0494, 495.4318, 535.4753, 552.5039                        | 3.10       | 1.3E-05        | 1.68 | 2.5E-05        | 0.74 | 5.6E-05        | 0.70 |
| 5.25        | PA(P-42:4)                | [M-H] <sup>-</sup>                | 763.5653   | 253.2146, 703.5424                                           | 1.69       | 1.1E-03        | 2.30 | 5.4E-01        | 0.94 | 8.3E-01        | 1.02 |
| 5.49        | PE(40:8)                  | [M-H] <sup>-</sup>                | 786.5107   | 241.0559, 328.1448                                           | 1.13       | 4.3E-02        | 1.29 | 5.6E-02        | 0.85 | 3.2E-01        | 0.91 |



|      |                           |                    |          |                                                                        |      |         |      |         |      |         |      |
|------|---------------------------|--------------------|----------|------------------------------------------------------------------------|------|---------|------|---------|------|---------|------|
| 5.65 | PS(40:6)                  | [M-H] <sup>-</sup> | 834.5303 | 78.9634, 465.2479, 747.4771                                            | 2.74 | 1.9E-03 | 1.59 | 5.3E-02 | 0.77 | 2.3E-03 | 0.71 |
| 5.70 | PS(41:5)                  | [M-H] <sup>-</sup> | 850.5623 | 59.0121, 255.2346, 506.3257, 792.5652                                  | 4.25 | 4.9E-02 | 1.23 | 3.3E-03 | 0.79 | 8.0E-03 | 0.80 |
| 5.70 | PI(38:4)                  | [M-H] <sup>-</sup> | 885.5507 | 151.0651, 241.0197, 283.2698,<br>581.3164, 799.4825                    | 4.01 | 7.0E-03 | 1.32 | 4.4E-03 | 0.80 | 4.6E-02 | 0.85 |
| 5.77 | PI(36:2)                  | [M-H] <sup>-</sup> | 861.5511 | 409.2314, 789.5355                                                     | 1.33 | 3.6E-02 | 1.32 | 3.6E-02 | 0.81 | 6.8E-02 | 0.82 |
| 5.89 | PS(36:2)                  | [M-H] <sup>-</sup> | 786.5327 | 328.1448, 398.3309, 712.4988,<br>728.5265                              | 1.42 | 2.2E-02 | 1.68 | 2.2E-01 | 0.78 | 8.0E-01 | 1.03 |
| 5.89 | PS(39:3)                  | [M-H] <sup>-</sup> | 826.5620 | 140.0099, 255.2355, 283.2663,<br>506.3617, 715.5089                    | 3.11 | 5.9E-03 | 1.20 | 2.6E-03 | 0.84 | 1.1E-01 | 0.89 |
| 5.92 | PE(38:6)                  | [M-H] <sup>-</sup> | 762.5104 | 196.0435, 304.2463, 329.2524,<br>452.2850, 482.2645                    | 2.67 | 1.1E-02 | 1.25 | 1.1E-02 | 0.85 | 9.4E-03 | 0.83 |
| 6.04 | PE(40:7)                  | [M-H] <sup>-</sup> | 788.5259 | 152.9933, 419.2571, 701.5267                                           | 2.82 | 4.9E-02 | 1.18 | 2.1E-03 | 0.83 | 3.0E-03 | 0.80 |
| 6.29 | PE(O-38:7)/<br>PE(P-38:6) | [M-H] <sup>-</sup> | 746.5155 | 78.9621, 140.0061, 196.0357, 282.2614,<br>303.2394, 329.2543, 462.3122 | 2.49 | 4.9E-03 | 1.18 | 9.6E-06 | 0.80 | 2.0E-04 | 0.79 |
| 6.29 | PI(36:1)                  | [M-H] <sup>-</sup> | 863.5660 | 56.0194, 96.9607                                                       | 1.01 | 1.7E-02 | 1.50 | 4.2E-01 | 0.93 | 3.0E-02 | 0.80 |
| 6.39 | PE(P-40:7)                | [M-H] <sup>-</sup> | 772.5311 | 112.9837, 355.2584, 440.3079                                           | 1.66 | 2.7E-02 | 1.21 | 2.3E-03 | 0.78 | 2.8E-03 | 0.75 |
| 6.42 | PS(41:3)                  | [M-H] <sup>-</sup> | 854.5891 | 96.9620, 283.2685, 305.2548, 795.5634                                  | 1.44 | 2.7E-02 | 1.14 | 2.1E-04 | 0.76 | 3.8E-04 | 0.73 |
| 6.47 | PE(O-36:5)<br>/PE(P-36:4) | [M-H] <sup>-</sup> | 722.5157 | 112.9896, 305.2560, 443.2293                                           | 2.03 | 3.2E-02 | 1.14 | 4.1E-05 | 0.80 | 1.3E-03 | 0.80 |
| 6.57 | PE(O-38:6)/<br>PE(P-38:5) | [M-H] <sup>-</sup> | 748.5312 | 278.2246, 301.2233, 436.2922                                           | 2.27 | 3.0E-02 | 1.17 | 2.2E-03 | 0.79 | 1.4E-02 | 0.82 |
| 6.69 | PE(O-36:4)<br>/PE(P-36:3) | [M-H] <sup>-</sup> | 724.5317 | 159.0703, 281.2542, 463.3244                                           | 1.07 | 3.0E-02 | 1.18 | 3.1E-03 | 0.80 | 1.1E-02 | 0.82 |
| 6.69 | PE(40:6)                  | [M-H] <sup>-</sup> | 790.5399 | 112.9862, 283.2628, 559.3010                                           | 4.13 | 1.5E-04 | 1.35 | 9.2E-03 | 0.84 | 1.7E-02 | 0.83 |
| 6.75 | PE(34:1)                  | [M-H] <sup>-</sup> | 716.5267 | 68.9961, 112.9857, 136.117                                             | 1.84 | 1.7E-04 | 1.37 | 2.7E-05 | 0.81 | 3.6E-04 | 0.79 |
| 6.87 | PE(38:4)                  | [M-H] <sup>-</sup> | 766.5416 | 112.9838, 196.0287, 283.2687,<br>303.2284, 480.3210, 633.4822          | 2.78 | 1.5E-02 | 1.19 | 8.0E-04 | 0.79 | 5.9E-03 | 0.82 |
| 7.05 | PE(P-40:6)                | [M-H] <sup>-</sup> | 774.5460 | 283.2546, 327.2401, 464.3232                                           | 1.95 | 6.5E-03 | 1.19 | 1.0E-04 | 0.79 | 3.2E-04 | 0.76 |
| 7.15 | PE(O-34:2)/<br>PE(P-34:1) | [M-H] <sup>-</sup> | 700.5320 | 184.1088, 196.1561, 309.1766                                           | 2.52 | 1.6E-04 | 1.39 | 1.9E-02 | 0.84 | 2.8E-02 | 0.87 |
| 7.17 | PE(38:3)                  | [M-H] <sup>-</sup> | 768.5536 | 112.9853, 353.1426, 564.5161                                           | 1.22 | 1.1E-03 | 1.30 | 7.8E-03 | 0.81 | 1.2E-02 | 0.82 |
| 7.24 | PE(O-38:5)/<br>PE(P-38:4) | [M-H] <sup>-</sup> | 750.5471 | 303.2283, 418.2845, 676.5150                                           | 2.00 | 8.2E-03 | 1.17 | 2.0E-04 | 0.79 | 2.1E-03 | 0.81 |
| 7.27 | PS(39:0)                  | [M-H] <sup>-</sup> | 832.6093 | 89.0286, 423.2612                                                      | 2.04 | 2.7E-02 | 1.16 | 1.4E-03 | 0.80 | 5.3E-03 | 0.80 |
| 8.72 | PS(43:0)                  | [M-H] <sup>-</sup> | 888.6714 | 146.9666, 669.5148                                                     | 1.07 | 2.6E-03 | 1.30 | 3.9E-03 | 0.83 | 1.9E-01 | 0.91 |

FC: Fold Change, means raw abundance of group (2)/group (1), > 1 or < 1 means increased or decreased, respectively.

PC: Phosphatidylcholine, PC-(O/P): Plasmalogen, PA: Phosphatidic acid, SM: Sphingomyelin, Cer: Ceramide, DG: Diacylglycerol, TG: Triacylglycerol, PE: Phosphatidylethanolamine, PI: Phosphatidylinositol, PS: Phosphatidylserine.

**Table S2. Chemical similarity enrichment analysis of differential lipids**

| <b>Cluster name</b>       | <b>Cluster size</b> | <b><i>p</i>-value</b> | <b>FDR</b> | <b>Altered lipids</b> | <b>Increased</b> | <b>Decreased</b> | <b>Increased ratio</b> |
|---------------------------|---------------------|-----------------------|------------|-----------------------|------------------|------------------|------------------------|
| triglycerides             | 14                  | 2.1E-12               | 1.5E-11    | 14                    | 14               | 0                | 1                      |
| phosphatidylethanolamines | 10                  | 1.4E-08               | 4.9E-08    | 10                    | 10               | 0                | 1                      |
| phosphatidylserines       | 7                   | 3.2E-06               | 4.4E-06    | 7                     | 7                | 0                | 1                      |
| phosphatidylcholines      | 6                   | 0.000011              | 0.000012   | 6                     | 6                | 0                | 1                      |
| plasmalogens              | 5                   | 2.4E-08               | 5.7E-08    | 5                     | 5                | 0                | 1                      |
| sphingolipids             | 3                   | 2.2E-07               | 3.8E-07    | 3                     | 3                | 0                | 1                      |
| phosphatidylinositols     | 3                   | 0.000047              | 0.000047   | 3                     | 3                | 0                | 1                      |

*p*-value is the result of the Kolmogorov Smirnov test evaluating how significant difference a metabolite cluster was represented by chance. FDR is the Benjamini Hochberg corrected *p* value. The Increased or Decreased shows the numbers of increased or decreased significant compounds in a cluster. The Increased ratio means increased compounds/total altered metabolites.

| Pathway                                                    | Total | Hits | Raw <i>p</i> | Holm adjust | FDR     | Impact  |
|------------------------------------------------------------|-------|------|--------------|-------------|---------|---------|
| Glycerophospholipid metabolism                             | 36    | 9    | 5.9E-13      | 4.9E-11     | 4.9E-11 | 0.4667  |
| Glycerolipid metabolism                                    | 16    | 4    | 5.8E-06      | 4.8E-04     | 2.4E-04 | 0.21775 |
| Phosphatidylinositol signaling system                      | 28    | 3    | 1.5E-03      | 1.2E-01     | 4.1E-02 | 0.12464 |
| Glycosylphosphatidylinositol (GPI)-<br>anchor biosynthesis | 14    | 2    | 5.9E-03      | 4.8E-01     | 1.2E-01 | 0.00399 |
| Inositol phosphate metabolism                              | 30    | 2    | 2.6E-02      | 1.0E+00     | 3.7E-01 | 0.0777  |
| Sphingolipid metabolism                                    | 21    | 2    | 1.3E-02      | 1.0E+00     | 2.2E-01 | 0.26978 |
| Linoleic acid metabolism                                   | 5     | 1    | 4.2E-02      | 1.0E+00     | 5.1E-01 | 0       |
| alpha-Linolenic acid metabolism                            | 13    | 1    | 1.1E-01      | 1.0E+00     | 1.0E+00 | 0       |
| Arachidonic acid metabolism                                | 36    | 1    | 2.7E-01      | 1.0E+00     | 1.0E+00 | 0       |
| Ether lipid metabolism                                     | 20    | 1    | 1.6E-01      | 1.0E+00     | 1.0E+00 | 0.18072 |

**Table S3. Disturbed metabolic pathways in gouty arthritis**

The Total is the total number of compounds in the metabolic pathway. The Hits is the actually matched number from the user uploaded data. The Raw *p* is the original *p* value calculated from the enrichment analysis. The Holm *p* is the *p* value adjusted by Holm-Bonferroni method. The FDR is the *p* value adjusted using False Discovery Rate. The Impact is the pathway impact value calculated from pathway topology analysis.

**Table S4. Anthocyanins identified by UPLC-Q-TOF-MS from LR**

| Peak No. | RT (min) | Identification                                                                                                                     | Short name    | <i>m/z</i> | Formula                                         | MS/MS       |
|----------|----------|------------------------------------------------------------------------------------------------------------------------------------|---------------|------------|-------------------------------------------------|-------------|
| 1        | 3.827    | petunidin 3-rutinoside-5-glucoside                                                                                                 | Petunidin 1   | 787.2293   | C <sub>34</sub> H <sub>42</sub> O <sub>21</sub> | 317/479/625 |
| 2        | 4.260    | petunidin-3-O-glucoside-5-O-glucoside                                                                                              | Petunidin 2   | 641.1723   | C <sub>28</sub> H <sub>33</sub> O <sub>17</sub> | 479/317     |
| 3        | 6.028    | petunidin-3-O-glucoside                                                                                                            | Petunidin 3   | 479.1175   | C <sub>22</sub> H <sub>23</sub> O <sub>12</sub> | 317         |
| 4        | 7.946    | petunidin-3-O-[6-O-(4-O-(4-O-(β-D-glucopyranosyl)-p-coumaroyl)-α-L-rhamnopyranosyl)-β-D-glucopyranoside]-5-O-[β-D-glucopyranoside] | Petunidin 4   | 1095.3152  | C <sub>49</sub> H <sub>58</sub> O <sub>28</sub> | 317/479/933 |
| 5        | 11.847   | petunidin-3-O-[6-O-(4-O-p-caffeoyl-α-L-rhamnopyranosyl)-β-D-glucopyranoside]-5-O-[β-D-glucopyranoside]                             | Petunidin 5   | 949.2647   | C <sub>43</sub> H <sub>50</sub> O <sub>24</sub> | 317/479/787 |
| 6        | 12.057   | delphinidin-3-O-[6-O-(4-O-p-coumaroyl-α-L-rhamnopyranosyl)-β-D-glucopyranoside]-5-O-[β-D-glucopyranoside]                          | Delphinidin 1 | 919.2475   | C <sub>42</sub> H <sub>47</sub> O <sub>23</sub> | 303/465/757 |
| 7        | 12.232   | petunidin-3-O-p-coumaroylrutinoside-5-O-glucoside                                                                                  | Petunidin 6   | 933.2661   | C <sub>43</sub> H <sub>48</sub> O <sub>23</sub> | 317/479/771 |
| 8        | 14.332   | delphinidin-3-O-(p-coumaroyl)-glucoside                                                                                            | Delphinidin 2 | 611.1605   | C <sub>27</sub> H <sub>30</sub> O <sub>16</sub> | 303         |
| 9        | 15.333   | petunidin-3-O-[6-O-(4-O-cis-p-coumaroyl-α-L-rhamnopyranosyl)-β-D-glucopyranoside]-5-O-[β-D-glucopyranoside]                        | Petunidin 7   | 933.2661   | C <sub>43</sub> H <sub>48</sub> O <sub>23</sub> | 317/479/771 |
|          |          | petunidin-3-O-[6-O-(4-O-trans-p-coumaroyl-α-L-rhamnopyranosyl)-β-D-glucopyranoside]-5-O-[β-D-glucopyranoside]                      | Petunidin 8   | 933.2661   | C <sub>43</sub> H <sub>48</sub> O <sub>23</sub> | 317/479/771 |
| 10       | 16.05    | petunidin-3-O-p-coumaroyl-rutinoside-5-O-glucoside                                                                                 | Petunidin 9   | 933.2661   | C <sub>43</sub> H <sub>48</sub> O <sub>23</sub> | 317/479/771 |
| 11       | 17.851   | malvidin-3-O-[6-O-(4-O-p-coumaroyl-α-L-rhamnosyl)-β-D-glucopyranoside]-5-O-β-D-glucopyranoside                                     | Malvidin 1    | 947.2821   | C <sub>44</sub> H <sub>50</sub> O <sub>23</sub> | 331/493/785 |
| 12       | 21.002   | petunidin-3-O-(p-coumaroyl)-rutinoside                                                                                             | Petunidin 10  | 771.2011   | C <sub>37</sub> H <sub>39</sub> O <sub>18</sub> | 317/479     |

**Table S5. The typical components and related targets in LR anthocyanins**

| Components                                                                                                                         | Formula                                         | PubChem ID | Targets counts | Targets                                                                                                                     |
|------------------------------------------------------------------------------------------------------------------------------------|-------------------------------------------------|------------|----------------|-----------------------------------------------------------------------------------------------------------------------------|
| petunidin-3-rutinoside-5-glucoside                                                                                                 | C <sub>34</sub> H <sub>42</sub> O <sub>21</sub> | 44256960   | 17             | Abcb1b, Abcc1, Ache, Akt1, Csnk2a1, Egfr, F2, Hsd17b2, Insr, Maa, Mmp2, Mmp9, Oprm1, Pik3cg, Pla2g1b, Pparg, Ptgs2          |
| petunidin-3-O-glucoside-5-O-glucoside                                                                                              | C <sub>28</sub> H <sub>33</sub> O <sub>17</sub> | 75184857   | 18             | Abcb1b, Abcc1, Ache, Akt1, Csnk2a1, Egfr, F2, Hsd17b2, Insr, Maa, Mmp2, Mmp9, Oprm1, Pik3cg, Pla2g1b, Pparg, Ptgs2, Slc10a2 |
| petunidin-3-O-glucoside                                                                                                            | C <sub>22</sub> H <sub>23</sub> O <sub>12</sub> | 443651     | 18             | Abcb1b, Abcc1, Ache, Akt1, Csnk2a1, Egfr, F2, Hsd17b2, Insr, Maa, Mmp2, Mmp9, Oprm1, Pik3cg, Pla2g1b, Pparg, Ptgs2, Slc10a2 |
| petunidin-3-O-[6-O-(4-O-(4-O-(β-D-glucopyranosyl)-p-coumaroyl)-α-L-rhamnopyranosyl)-β-D-glucopyranoside]-5-O-[β-D-glucopyranoside] | C <sub>49</sub> H <sub>58</sub> O <sub>28</sub> | 44256974   | 5              | Abcc1, Ache, Egfr, Mmp2, Ptgs2                                                                                              |
| petunidin-3-O-[6-O-(4-O-p-caffeoyl-α-L-rhamnopyranosyl)-β-D-glucopyranoside]-5-O-[β-D-glucopyranoside]                             | C <sub>43</sub> H <sub>48</sub> O <sub>24</sub> | 44256970   | 5              | Abcc1, Ache, Egfr, Mmp2, Ptgs2                                                                                              |
| delphinidin-3-O-[6-O-(4-O-p-coumaroyl-α-L-rhamnopyranosyl)-β-D-glucopyranoside]-5-O-[β-D-glucopyranoside]                          | C <sub>42</sub> H <sub>46</sub> O <sub>23</sub> | 138319216  | 17             | Abcc1, Ace, Ache, Casp1, Csnk2a1, Egfr, F2, Hmgcr, Hsp90aa1, Mme, Mmp2, Oprm1, Plau, Ptgs1, Ptgs2, Ren1, Slc10a2            |
| petunidin-3-O-p-coumaroyl-rutinoside-5-glucoside                                                                                   | C <sub>43</sub> H <sub>48</sub> O <sub>23</sub> | 9897848    | 5              | Abcc1, Ache, Egfr, Mmp2, Ptgs2                                                                                              |
| delphinidin-3-O-(p-coumaroyl)-glucoside                                                                                            | C <sub>27</sub> H <sub>30</sub> O <sub>16</sub> | 15922818   | 11             | Abcc1, Ache, Egfr, F2, Insr, Mmp2, Oprm1, Pik3cg, Plau, Ptgs2, Raf1                                                         |
| petunidin-3-O-[6-O-(4-O-cis-p-coumaroyl-α-L-rhamnopyranosyl)-β-D-glucopyranoside]-5-O-[β-D-glucopyranoside]                        | C <sub>43</sub> H <sub>48</sub> O <sub>23</sub> | 9897848    | 5              | Abcc1, Ache, Egfr, Mmp2, Ptgs2                                                                                              |
| petunidin-3-O-[6-O-(4-O-trans-p-coumaroyl-α-L-rhamnopyranosyl)-β-D-glucopyranoside]-5-O-[β-D-glucopyranoside]                      | C <sub>43</sub> H <sub>48</sub> O <sub>23</sub> | 134722739  | 5              | Abcc1, Ache, Egfr, Mmp2, Ptgs2                                                                                              |
| petunidin-3-O-p-coumaroyl-rutinoside-5-glucoside                                                                                   | C <sub>43</sub> H <sub>48</sub> O <sub>23</sub> | 44256967   | 5              | Abcc1, Ache, Egfr, Mmp2, Ptgs2                                                                                              |
| malvidin-3-O-[6-O-(4-O-p-coumaroyl-α-L-rhamnosyl)-β-D-glucopyranoside]-5-O-β-D-glucopyranoside                                     | C <sub>44</sub> H <sub>50</sub> O <sub>23</sub> | 44257010   | 5              | Abcc1, Ache, Egfr, Mmp2, Ptgs2                                                                                              |
| petunidin-3-O-(p-coumaroyl)-rutinoside                                                                                             | C <sub>37</sub> H <sub>39</sub> O <sub>18</sub> | 44256964   | 6              | Abcc1, Ache, Egfr, F2, Mmp2, Ptgs2                                                                                          |

**Table S6. Functional enrichment results of potential targets**

| Pathways                             | Potential targets                                                                                                 | Counts | <i>p</i> value | FDR      |
|--------------------------------------|-------------------------------------------------------------------------------------------------------------------|--------|----------------|----------|
| Pathways in cancer                   | CSF1R, MAP2K1, HSP90AA1, MMP2, BRAF, PTGS2, MMP9, PIK3CG, MTOR, EGFR, PIK3CA, KIT, ABL1, AKT1, MAPK1, PPARG, RAF1 | 17     | 1.22E-09       | 5.01E-08 |
| Ras signaling pathway                | CSF1R, MAP2K1, FLT1, PLA2G1B, INSR, PIK3CG, EGFR, PIK3CA, KIT, ABL1, AKT1, MAPK1, RAF1                            | 13     | 1.27E-08       | 1.07E-07 |
| PI3K-Akt signaling pathway           | CSF1R, MAP2K1, HSP90AA1, FLT1, INSR, PIK3CG, MTOR, EGFR, PIK3CA, KIT, AKT1, MAPK1, RAF1                           | 13     | 1.35E-06       | 4.95E-06 |
| Prostate cancer                      | MAP2K1, HSP90AA1, PIK3CA, AKT1, MAPK1, BRAF, RAF1, EGFR, PIK3CG, MTOR                                             | 10     | 3.13E-09       | 5.01E-08 |
| FoxO signaling pathway               | MAP2K1, PIK3CA, INSR, AKT1, MAPK1, BRAF, MAPK14, RAF1, EGFR, PIK3CG                                               | 10     | 1.29E-07       | 7.04E-07 |
| Central carbon metabolism in cancer  | MAP2K1, PIK3CA, KIT, AKT1, MAPK1, RAF1, EGFR, PIK3CG, MTOR                                                        | 9      | 5.05E-09       | 6.10E-08 |
| HIF-1 signaling pathway              | MAP2K1, FLT1, PIK3CA, INSR, AKT1, MAPK1, EGFR, PIK3CG, MTOR                                                       | 9      | 2.09E-07       | 9.71E-07 |
| Sphingolipid signaling pathway       | ABCC1, MAP2K1, PIK3CA, AKT1, MAPK1, FYN, MAPK14, RAF1, PIK3CG                                                     | 9      | 9.44E-07       | 3.66E-06 |
| VEGF signaling pathway               | MAP2K1, PIK3CA, AKT1, MAPK1, MAPK14, PTGS2, RAF1, PIK3CG                                                          | 8      | 8.17E-08       | 4.75E-07 |
| Choline metabolism in cancer         | MAP2K1, PIK3CA, AKT1, MAPK1, RAF1, EGFR, PIK3CG, MTOR                                                             | 8      | 2.99E-06       | 8.96E-06 |
| TNF signaling pathway                | MAP2K1, PIK3CA, AKT1, MAPK1, MAPK14, PTGS2, MMP9, PIK3CG                                                          | 8      | 4.98E-06       | 1.34E-05 |
| cAMP signaling pathway               | MAP2K1, PIK3CA, AKT1, MAPK1, BRAF, PPARA, RAF1, PIK3CG                                                            | 8      | 2.24E-04       | 4.26E-04 |
| AMPK signaling pathway               | PIK3CA, INSR, AKT1, PPARG, HMGCR, PIK3CG, MTOR                                                                    | 7      | 1.47E-04       | 3.11E-04 |
| MAPK signaling pathway               | MAP2K1, AKT1, MAPK1, BRAF, MAPK14, RAF1, EGFR                                                                     | 7      | 4.91E-03       | 7.48E-03 |
| mTOR signaling pathway               | PIK3CA, AKT1, MAPK1, BRAF, PIK3CG, MTOR                                                                           | 6      | 3.29E-05       | 8.06E-05 |
| Toll-like receptor signaling pathway | MAP2K1, PIK3CA, AKT1, MAPK1, MAPK14, PIK3CG                                                                       | 6      | 4.26E-04       | 7.48E-04 |
| Arachidonic acid metabolism          | PLA2G1B, LTA4H, PTGS2, PTGS1                                                                                      | 4      | 1.88E-02       | 2.36E-02 |
| NF-kappa B signaling pathway         | CSNK2A1, PLA2G1B, BTK, PTGS2                                                                                      | 4      | 2.36E-02       | 2.85E-02 |
| Ovarian steroidogenesis              | INSR, HSD17B2, PTGS2                                                                                              | 3      | 5.08E-02       | 5.84E-02 |

The Counts represent the total numbers of potential targets involved in the corresponding pathways. The *p* value is the original *p* value calculated from the enrichment analysis. The FDR is the *p* value adjusted using False Discovery Rate.

**Table S7. Molecular docking results of active components from LR anthocyanins and target proteins**

| Short name    | Akt1         | Egfr         | F2           | Hsp90aa1     | Insr  | Map2k1       | Mapk1 | Mapk14       | Mmp2         | Mmp9         | Mtor  | Pik3ca       | Pik3cg | Ppar<br>g   | Ptgs2        | Raf1  |
|---------------|--------------|--------------|--------------|--------------|-------|--------------|-------|--------------|--------------|--------------|-------|--------------|--------|-------------|--------------|-------|
| Petunidin 1   | <b>-4.39</b> | -1.49        | -2.92        | -2.72        | -0.53 | -2.08        | -1.7  | -1.88        | -2.91        | -3.35        | -2.73 | -2.01        | -0.01  | -1.45       | -1.65        | -1.36 |
| Petunidin 2   | -3.39        | -3.43        | -3.92        | -3.62        | -1.87 | -3.19        | -2.96 | -3.2         | <b>-4.41</b> | <b>-4.24</b> | -2.98 | -3.91        | -2.34  | -3.19       | <b>-4.04</b> | -3.92 |
| Petunidin 3   | -3.84        | -2.36        | <b>-4.73</b> | -3.63        | -1.7  | <b>-4.3</b>  | -1.81 | -2.77        | <b>-4.49</b> | <b>-4.08</b> | -3.79 | -2.68        | -1.82  | -2.52       | -2.46        | -3.55 |
| Petunidin 4   | -2.29        | -2.13        | -2.38        | -2.97        | -1.05 | -2.88        | -2.08 | -1.5         | -3.82        | -2.9         | -2.73 | -3.74        | -0.03  | -2.79       | -2.07        | -2.65 |
| Petunidin 5   | 0.21         | -2.28        | -1.54        | -2.42        | 1.19  | -1.15        | -0.44 | -0.64        | -3.09        | -4.27        | -1.96 | -0.79        | 2.81   | -0.15       | 0.34         | -1.52 |
| Delphinidin 1 | -2.97        | -1.51        | -2.57        | -1.87        | -1.44 | -1.42        | -1.51 | -1.27        | -1.16        | -2.42        | -2.4  | -0.74        | -0.54  | -0.62       | -0.55        | -0.97 |
| Petunidin 6   | 0.48         | 1.2          | 1.98         | 0.61         | 1.8   | 1.42         | 1.54  | 1.09         | 1.24         | -0.1         | 1.64  | -1.04        | 1.95   | 2.08        | 3.28         | 2.51  |
| Delphinidin 2 | -3.21        | -2.5         | -3.7         | -3.97        | -1.02 | <b>-5.47</b> | -0.67 | -1.01        | <b>-4.85</b> | <b>-4.13</b> | -2.21 | -3.7         | -1.26  | -2.97       | -1.53        | -1.94 |
| Petunidin 7   | -2.04        | -1.62        | -2.62        | <b>-4.58</b> | -2    | -2.16        | -3.45 | -0.63        | -2.62        | -3.73        | -3.87 | -1.98        | 0.76   | -1.1        | -0.59        | -1.93 |
| Petunidin 8   | -0.76        | -2.79        | <b>-4.66</b> | -3.17        | -1.46 | -2.4         | -3.21 | <b>-5.04</b> | <b>-5.12</b> | <b>-4.3</b>  | -3.09 | -2.51        | -0.55  | -2.3        | -2.79        | -3.6  |
| Petunidin 9   | 0.48         | 1.2          | 1.98         | 0.61         | 1.8   | 1.42         | 1.54  | 1.09         | 1.24         | -0.1         | 1.64  | -1.04        | 1.95   | 2.08        | 3.28         | 2.51  |
| Malvidin 1    | 1.91         | 2.52         | 1.26         | -0.56        | 3.38  | 1.63         | 2.48  | 1.51         | -0.16        | -0.65        | 1.62  | 1.87         | 2.85   | 2.53        | 2.64         | 1.86  |
| Petunidin 10  | -3.22        | <b>-4.39</b> | <b>-4.16</b> | <b>-4.17</b> | -2.48 | <b>-5.07</b> | -3.03 | -3.87        | <b>-4.91</b> | <b>-5.13</b> | -3.82 | <b>-4.73</b> | -1.39  | <b>-4.1</b> | -3.65        | -2.96 |

Grey: binding energy was higher than 0 kcal/mol, black: less than 0 kcal/mol, bold black: less than -4 kcal/mol (high binding activity between the compound and target protein receptor), bold red: less than -5 kcal/mol (ultra-high binding activity between the compound and target protein receptor).
